# Supplementary material for: PBPK-based translation from preclinical species to humans for the full-size IgG therapeutic efalizumab
Source: PubMed Central journal article supplement (PMC11473394; doi:10.3389/fphar.2024.1418870), 2024-10-01
Supplement: DataSheet1.pdf [file DataSheet1.pdf]

## *Supplementary Material*

# **PBPK-based translation from preclinical species to humans for the full-size IgG therapeutic efalizumab**

**Maria Franz<sup>1\*</sup>, Ravi Kumar Jairam<sup>2</sup>, Lars Kuepfer<sup>2</sup>, Nina Hanke<sup>1</sup>**

<sup>1</sup>Translational Medicine and Clinical Pharmacology, Boehringer Ingelheim Pharma GmbH & Co. KG, 88400 Biberach an der Riß, Germany

<sup>2</sup>Institute for Systems Medicine with Focus on Organ Interaction, University Hospital RWTH Aachen, 52062 Aachen, Germany

**\* Correspondence:**

Maria Franz  
maria.franz@boehringer-ingelheim.com

## **1 Supplementary Figures and Tables**

### **1.1 Supplementary Figures**

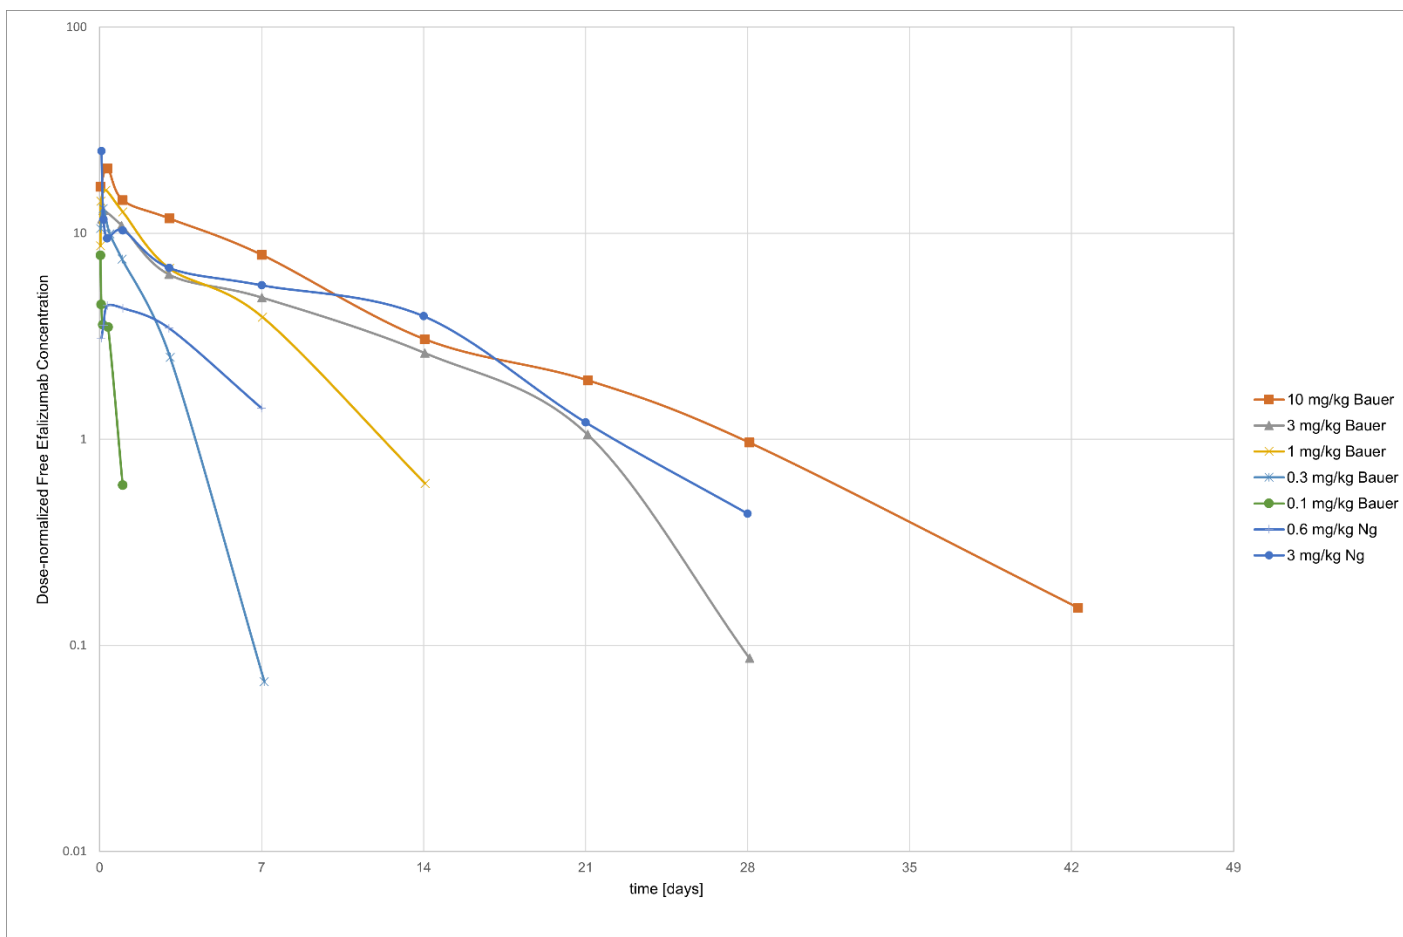

**Supplementary Figure 1.** Dose-normalized plot of the observed plasma efalizumab concentrations following intravenous administration in human. Data were obtained from literature (Bauer et al., 1999; Ng et al., 2005). Data from Ng et al. were not considered for model development as the concentration-time profile for the 0.6 mg/kg dose does not align well with the other observed data (early measurements are not lying between the observations of 0.3 mg/kg dose and 1 mg/kg dose).

## 1.2 Supplementary Tables

**Supplementary Table 1.** Local sensitivity analysis of the human efalizumab PBPK model performed in OSP suite.  $CD11a(ref)$  CD11a reference concentration,  $K_D$  equilibrium dissociation rate constant of the drug-target-complex,  $K_{D,FcRn}$  equilibrium dissociation rate constant of the drug-FcRn-

complex,  $k_{int,C}$  internalization rate of the drug-target-complex,  $k_{int,T}$  internalization rate of the target,  $k_{off}$  dissociation rate constant of the drug-target-complex.

| Parameter    | AUC extrapolated to infinity, dose 0.1 mg/kg | AUC extrapolated to infinity, dose 0.3 mg/kg | AUC extrapolated to infinity, dose 1 mg/kg | AUC extrapolated to infinity, dose 3 mg/kg | AUC extrapolated to infinity, dose 10 mg/kg |
|--------------|----------------------------------------------|----------------------------------------------|--------------------------------------------|--------------------------------------------|---------------------------------------------|
| $K_{D,FcRn}$ | - 0.04                                       | - 0.15                                       | - 0.5                                      | - 0.91                                     | - 1.25                                      |
| CD11a(ref)   | - 5.55                                       | - 2.15                                       | - 1.23                                     | - 0.3                                      | - 0.12                                      |
| $k_{int,T}$  | - 0.13                                       | - 0.34                                       | - 0.5                                      | - 0.22                                     | - 0.09                                      |
| $k_{int,C}$  | - 0.82                                       | - 0.2                                        | - 0.0095                                   | - 0.0075                                   | - 0.0019                                    |
| $k_{off}$    | - 0.11                                       | - 0.03                                       | - 0.011                                    | - 0.0011                                   | - 0.00026                                   |
| $K_D$        | 0.46                                         | 0.07                                         | 0.024                                      | 0.0026                                     | 0.00062                                     |

## 2 References

- Bauer, R. J., Dedrick, R. L., White, M. L., Murray, M. J., and Garovoy, M. R. (1999). Population Pharmacokinetics and Pharmacodynamics of the Anti-CD11a Antibody hu1124 in Human Subjects with Psoriasis. *J Pharmacokinet Biop* 27, 397–420. doi: 10.1023/a:1020917122093.
- Ng, C. M., Joshi, A., Dedrick, R. L., Garovoy, M. R., and Bauer, R. J. (2005). Pharmacokinetic–Pharmacodynamic–Efficacy Analysis of Efalizumab in Patients with Moderate to Severe Psoriasis. *Pharmaceut Res* 22, 1088–1100. doi: 10.1007/s11095-005-5642-4.
